# Supplementary material for: Vascular dysfunction and increased metastasis of B16F10 melanomas in Shb deficient mice as compared with their wild type counterparts
Source: Springer Nature journal article supplement (doi:10.1186/s12885-015-1269-y), 2015-04-07

Additional file 2

A

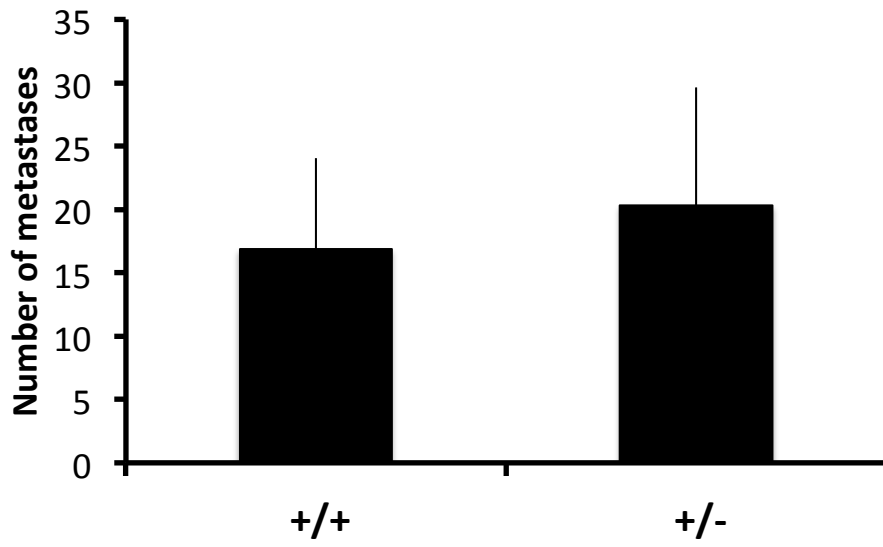

B

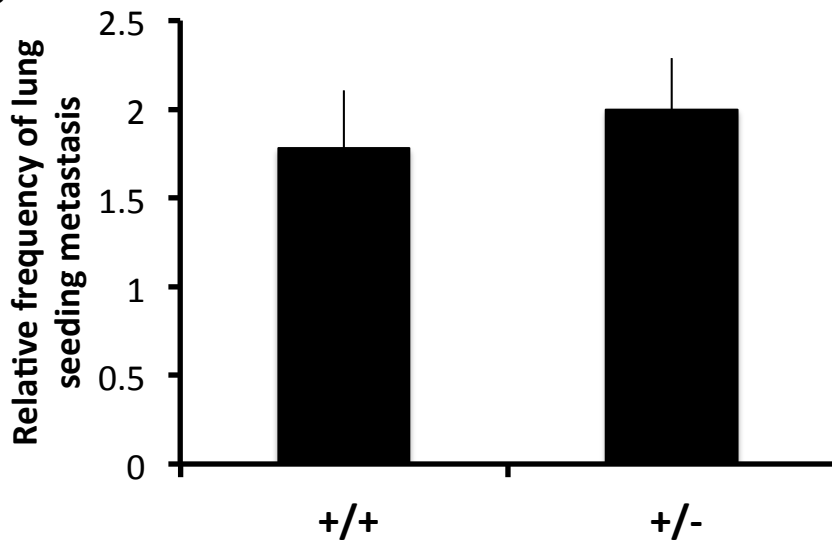

Supplement: MOESM2 [file 9744326]
